# Supplementary material for: An Examination of Serum Acylcarnitine and Amino Acid Profiles at Different Time Point of Ketogenic Diet Therapy and Their Association of Ketogenic Diet Effectiveness
Source: PubMed Central journal article supplement (PMC7822492; doi:10.3390/nu13010021), 2020-12-23
Supplement: nutrients-13-00021-s001.pdf [file nutrients-13-00021-s001.pdf]

## Supplementary Materials

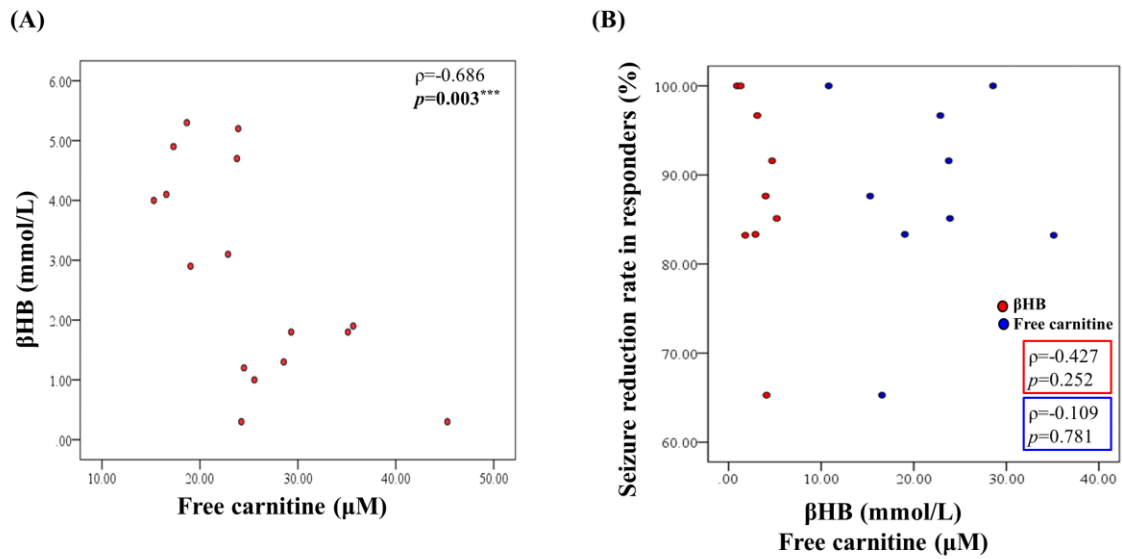

**Figure S1.** The correlation of free carnitine between βHB, and seizure reduction rate. (A) The plasma free carnitine was negatively correlated with βHB level ( $\rho = -0.478$ ,  $P = 0.028$ ). (B) Neither βHB nor free carnitine level was correlated with seizure reduction rate (βHB v.s. seizure reduction rate,  $\rho = -0.427$ ,  $P = 0.252$ ; free carnitine v.s. seizure reduction rate,  $\rho = -0.109$ ,  $P = 0.781$ ).

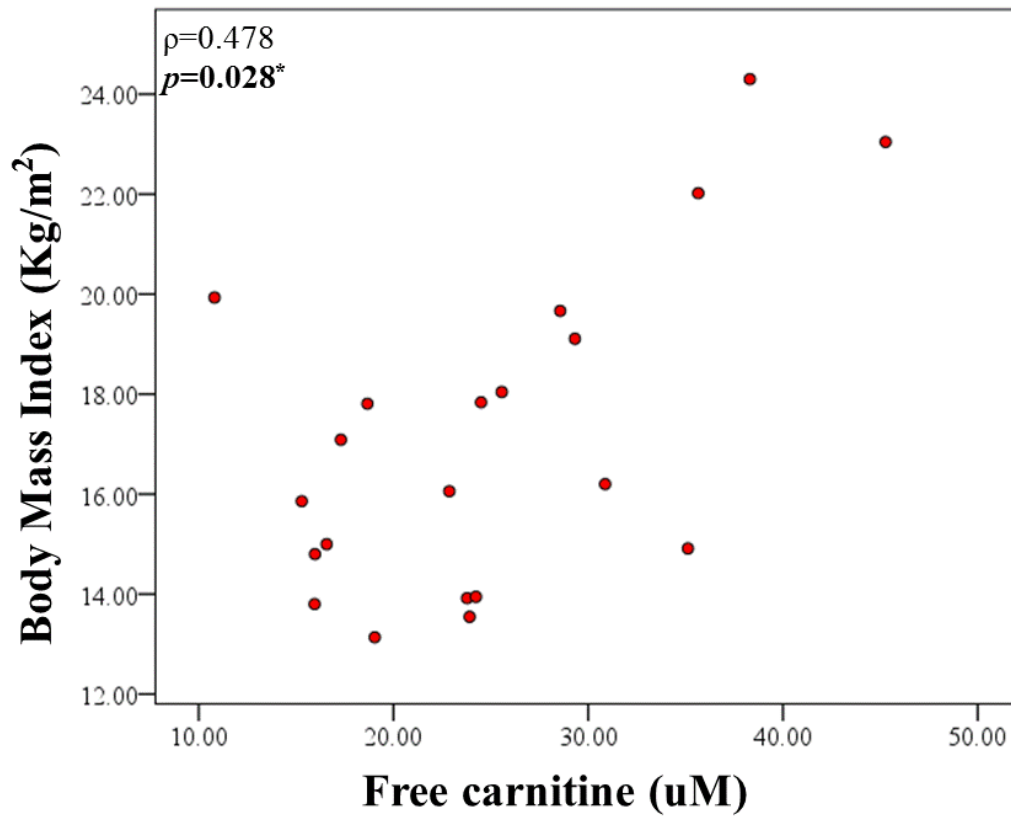

**Figure 2.** The plasma free carnitine was positively correlated with body mass index by Spearman zero order correlation ( $\rho=0.478, P<0.05$ ).

**Table 1.** Demographic data of 22 study subjects.

| Case | Gender | Initial age of KD (years; months) | No of AEDs | Main Seizure Type        | Etiology   | Baseline Seizure Frequency (per month) | 12 month- Seizure Frequency (per month) | Seizure Reduction Rate |
|------|--------|-----------------------------------|------------|--------------------------|------------|----------------------------------------|-----------------------------------------|------------------------|
| 1    | M      | 0; 8                              | 2          | Infantile spasm          | HIE        | 5                                      | 0                                       | $\geq 90\%$            |
| 2    | M      | 2; 4                              | 4          | Infantile spasm          | HIE        | 476                                    | 145                                     | 50%~90%                |
| 3    | M      | 19; 1                             | 2          | Generalized tonic-clonic | HIE        | 1                                      | 2                                       | $\leq 25\%$            |
| 4    | M      | 14; 5                             | 3          | Focal motor              | Immune     | 33                                     | 19                                      | 25%~50%                |
| 5    | M      | 10; 10                            | 2          | Generalized tonic-clonic | Unknown    | 1                                      | 1                                       | $\leq 25\%$            |
| 6    | F      | 15; 5                             | 4          | Generalized tonic-clonic | Unknown    | 1                                      | 0                                       | $\geq 90\%$            |
| 7    | M      | 2; 7                              | 3          | Infantile spasm          | HIE        | 252                                    | 88                                      | 50%~90%                |
| 8    | M      | 10; 3                             | 3          | Focal motor              | Unknown    | 224                                    | 33                                      | 50%~90%                |
| 9    | F      | 13; 2                             | 2          | Infantile spasm          | Unknown    | 280                                    | 222                                     | $\leq 25\%$            |
| 10   | F      | 15; 11                            | 2          | Generalized tonic-clonic | Genetic    | 5                                      | 1                                       | 50%~90%                |
| 11   | M      | 3; 1                              | 3          | Generalized tonic-clonic | Genetic    | 224                                    | 19                                      | $\geq 90\%$            |
| 12   | M      | 11; 4                             | 2          | Focal motor              | HIE        | 3                                      | 1                                       | 50%~90%                |
| 13   | M      | 9; 11                             | 2          | Generalized tonic-clonic | Genetic    | 32                                     | 18                                      | 25%~50%                |
| 14   | M      | 4; 1                              | 4          | Focal motor              | Immune     | 36                                     | 13                                      | 50%~90%                |
| 15   | M      | 1; 3                              | 2          | Infantile spasm          | Genetic    | 70                                     | 37                                      | 25%~50%                |
| 16   | M      | 17; 2                             | 1          | Focal motor              | Genetic    | 1                                      | 0                                       | $\geq 90\%$            |
| 17   | M      | 1; 2                              | 3          | Generalized tonic-clonic | Structural | 168                                    | 28                                      | 50%~90%                |
| 18   | F      | 0; 10                             | 4          | Focal motor              | Structural | 30                                     | 80                                      | $\leq 25\%$            |
| 19   | F      | 2; 4                              | 2          | Focal motor              | Genetic    | 8                                      | 4                                       | 50%~90%                |
| 20   | F      | 9; 7                              | 3          | Focal motor              | Infectious | 1                                      | 2                                       | $\leq 25\%$            |
| 21   | F      | 10; 1                             | 3          | Focal motor              | Genetic    | 55                                     | 24                                      | 50%~90%                |
| 22   | F      | 0; 3                              | 4          | Generalized tonic-clonic | Structural | 51                                     | 33                                      | 25%~50%                |

HIE: Hypoxic-ischemic encephalopathy.

**Table 2.** The clinical characteristics of responders and non-responders. Seizure types and etiologies were presented as the number (percentage). Patient profiles, including age, body weight (BW), and body mass index (BMI) are presented as the mean  $\pm$  standard deviation (SD). The number of AEDs used is presented as the median  $\pm$  SD. Groups differences were analyzed by the Fisher's exact test or repeated measures one-way analysis of variance with the Tukey method for post hoc comparisons. R: responders; NR: non-responders; \*P<0.05. All statistically significant values are bolded. \*P<0.05.

|                                      | Visit 1<br>Initial |                   |               | Visit 2<br>3 month |                   |               | Visit 3<br>6 month |                   |               | Visit 4<br>9 month |                   |               | Visit 5<br>12 month |                   |               |
|--------------------------------------|--------------------|-------------------|---------------|--------------------|-------------------|---------------|--------------------|-------------------|---------------|--------------------|-------------------|---------------|---------------------|-------------------|---------------|
|                                      | R<br>(N=13)        | NR<br>(N=9)       | P             | R<br>(N=13)        | NR<br>(N=9)       | P             | R<br>(N=13)        | NR<br>(N=9)       | P             | R<br>(N=13)        | NR<br>(N=9)       | P             | R<br>(N=13)         | NR<br>(N=9)       | P             |
| <b>Seizure types,no (%)</b>          |                    |                   |               |                    |                   |               |                    |                   |               |                    |                   |               |                     |                   |               |
| Focal motor                          | 5 (42.7)           | 4 (40.0)          | 0.841         |                    |                   |               |                    |                   |               |                    |                   |               |                     |                   |               |
| GTC                                  | 4 (33.3)           | 4 (40.0)          | 0.761         |                    |                   |               |                    |                   |               |                    |                   |               |                     |                   |               |
| Infantile spasm                      | 3 (25.0)           | 2 (20.0)          | 0.792         |                    |                   |               |                    |                   |               |                    |                   |               |                     |                   |               |
| <b>Etiology,no (%)</b>               |                    |                   |               |                    |                   |               |                    |                   |               |                    |                   |               |                     |                   |               |
| Structural                           | 1 (8.3)            | 2 (20.0)          | 0.469         |                    |                   |               |                    |                   |               |                    |                   |               |                     |                   |               |
| Genetic                              | 4 (33.3)           | 3 (30.0)          | 0.875         |                    |                   |               |                    |                   |               |                    |                   |               |                     |                   |               |
| Infectious                           | 0 (0.0)            | 1 (10.0)          | 0.284         |                    |                   |               |                    |                   |               |                    |                   |               |                     |                   |               |
| Metabolic                            | 0 (0.0)            | 0 (0.0)           | 1             |                    |                   |               |                    |                   |               |                    |                   |               |                     |                   |               |
| Immune                               | 1 (8.3)            | 1 (10.0)          | 0.899         |                    |                   |               |                    |                   |               |                    |                   |               |                     |                   |               |
| HIE                                  | 4 (33.3)           | 1 (10.0)          | 0.212         |                    |                   |               |                    |                   |               |                    |                   |               |                     |                   |               |
| Unknown                              | 2 (16.7)           | 2 (20.0)          | 0.85          |                    |                   |               |                    |                   |               |                    |                   |               |                     |                   |               |
| <b>Age</b>                           |                    |                   |               |                    |                   |               |                    |                   |               |                    |                   |               |                     |                   |               |
| Mean (SD)                            | 7.84 (5.78)        | 11.00(5.21)       | 0.207         |                    |                   |               |                    |                   |               |                    |                   |               |                     |                   |               |
| <b>BW (Kgs)</b>                      |                    |                   |               |                    |                   |               |                    |                   |               |                    |                   |               |                     |                   |               |
| Mean $\pm$ SD                        | 22.18 $\pm$ 22.62  | 29.70 $\pm$ 18.04 | 0.406         | 24.56 $\pm$ 19.95  | 29.87 $\pm$ 17.24 | 0.516         | 25.03 $\pm$ 21.04  | 28.94 $\pm$ 16.13 | 0.641         | 19.36 $\pm$ 11.24  | 28.84 $\pm$ 15.56 | 0.08          | 21.16 $\pm$ 11.76   | 32.13 $\pm$ 14.54 | 0.053         |
| <b>BMI (Kg/m<sup>2</sup>)</b>        |                    |                   |               |                    |                   |               |                    |                   |               |                    |                   |               |                     |                   |               |
| Mean $\pm$ SD                        | 16.26 $\pm$ 4.14   | 19.14 $\pm$ 3.31  | 0.057         | 16.62 $\pm$ 3.86   | 18.73 $\pm$ 3.00  | 0.129         | 16.36 $\pm$ 3.33   | 17.89 $\pm$ 2.94  | 0.231         | 15.16 $\pm$ 2.00   | 17.40 $\pm$ 3.08  | <b>0.042*</b> | 15.48 $\pm$ 2.16    | 18.23 $\pm$ 3.25  | <b>0.025*</b> |
| <b>No. of AEDs</b>                   |                    |                   |               |                    |                   |               |                    |                   |               |                    |                   |               |                     |                   |               |
| Median                               | 3                  | 2                 | 0.366         | 3                  | 2                 | 0.212         | 3                  | 2                 | 0.147         | 3                  | 2                 | 0.556         | 3                   | 2                 | 0.326         |
| <b>AEDs (mono or add-on), no (%)</b> |                    |                   |               |                    |                   |               |                    |                   |               |                    |                   |               |                     |                   |               |
| Valproate                            | 2 (9.09)           | 6 (27.27)         | <b>0.029*</b> | 2 (9.09)           | 6 (27.27)         | <b>0.029*</b> | 2 (9.09)           | 6 (27.27)         | <b>0.029*</b> | 2 (9.09)           | 6 (27.27)         | <b>0.029*</b> | 2 (9.09)            | 6 (27.27)         | <b>0.029*</b> |
| Oxcarbazepine                        | 4 (18.18)          | 2 (9.09)          | 0.434         | 4 (18.18)          | 2 (9.09)          | 0.434         | 4 (18.18)          | 2 (9.09)          | 0.434         | 4 (18.18)          | 2 (9.09)          | 0.434         | 4 (18.18)           | 2 (9.09)          | 0.434         |
| Topiramate                           | 2 (9.09)           | 2 (9.09)          | 0.901         | 2 (9.09)           | 2 (9.09)          | 0.901         | 2 (9.09)           | 2 (9.09)          | 0.901         | 2 (9.09)           | 2 (9.09)          | 0.901         | 1 (4.55)            | 2 (9.09)          | 0.485         |
| Lamotrigine                          | 1 (4.55)           | 2 (9.09)          | 0.485         | 1 (4.55)           | 2 (9.09)          | 0.485         | 1 (4.55)           | 2 (9.09)          | 0.485         | 1 (4.55)           | 2 (9.09)          | 0.485         | 1 (4.55)            | 2 (9.09)          | 0.485         |
| Vigabatrin                           | 2 (9.09)           | 1 (4.55)          | 0.626         | 2 (9.09)           | 1 (4.55)          | 0.626         | 2 (9.09)           | 1 (4.55)          | 0.626         | 2 (9.09)           | 1 (4.55)          | 0.626         | 2 (9.09)            | 1 (4.55)          | 0.626         |

R: Responders; NR: Non-responders;\*P<0.05; \*\*P<0.01;\*\*\*P<0.005; \*\*\*\*P<0.001

**Table S3.** The raw data of metabolic parameters in responders and non-responders for serial follow-up.

|                                    | Visit 1      |              |                      | Visit 2       |              |                       | Visit 3       |              |                       | Visit 4       |              |                       | Visit 5      |              |       |
|------------------------------------|--------------|--------------|----------------------|---------------|--------------|-----------------------|---------------|--------------|-----------------------|---------------|--------------|-----------------------|--------------|--------------|-------|
|                                    | Initial      |              |                      | 3 month       |              |                       | 6 month       |              |                       | 9 month       |              |                       | 12 month     |              |       |
|                                    | R<br>(N=13)  | NR<br>(N=9)  | p                    | R<br>(N=13)   | NR<br>(N=9)  | p                     | R<br>(N=13)   | NR<br>(N=9)  | p                     | R<br>(N=13)   | NR<br>(N=9)  | p                     | R<br>(N=13)  | NR<br>(N=9)  | p     |
| <b>Average BHB (mmol/L)</b>        | 3.24±1.00    | 2.33±1.91    | 0.302                | 3.18±1.82     | 2.06±1.04    | 0.098                 | 3.45±1.62     | 1.69±1.72    | 0.020 <sup>†</sup>    | 2.63±1.70     | 1.93±1.36    | 0.306                 | 2.47±1.67    | 2.21±2.10    | 0.788 |
| <b>Average free carnitine (µM)</b> | 25.12±7.28   | 26.20±10.69  | 0.802                | 22.93±4.65    | 25.10±10.24  | 0.571                 | 20.84±6.89    | 29.03±8.86   | 0.026 <sup>†</sup>    | 20.85±4.72    | 24.84±8.57   | 0.225                 | 24.16±5.79   | 23.66±10.07  | 0.898 |
| <b>C2</b>                          | 22.23±9.87   | 16.91±4.99   | 0.11                 | 28.42±7.74    | 27.85±8.13   | 0.875                 | 29.49±11.85   | 29.94±5.14   | 0.908                 | 26.17±9.66    | 25.35±9.64   | 0.85                  | 31.48±14.92  | 23.00±6.01   | 0.134 |
| <b>C3</b>                          | 1.32±0.43    | 2.36±1.27    | 0.024 <sup>†</sup>   | 0.80±0.68     | 1.79±1.49    | 0.074                 | 0.72±0.48     | 1.73±1.08    | 0.012 <sup>†</sup>    | 0.64±0.32     | 1.47±1.03    | 0.026 <sup>†</sup>    | 0.95±0.54    | 1.41±1.041   | 0.243 |
| <b>C4OH</b>                        | 0.15±0.12    | 0.07±0.03    | 0.033 <sup>†</sup>   | 0.39±0.14     | 0.33±0.13    | 0.332                 | 0.41±0.20     | 0.36±0.13    | 0.521                 | 0.35±0.19     | 0.29±0.05    | 0.326                 | 0.38±0.25    | 0.28±0.14    | 0.304 |
| <b>C4-DC</b>                       | 0.41±0.17    | 0.56±0.27    | 0.154                | 0.14±0.08     | 0.30±0.28    | 0.113                 | 0.14±0.12     | 0.25±0.24    | 0.227                 | 0.14±0.11     | 0.26±0.25    | 0.194                 | 0.15±0.16    | 0.22±0.19    | 0.411 |
| <b>C5</b>                          | 0.11±0.04    | 0.13±0.08    | 0.582                | 0.08±0.03     | 0.16±0.08    | 0.019 <sup>†</sup>    | 0.07±0.03     | 0.17±0.05    | 0.000 <sup>****</sup> | 0.07±0.03     | 0.17±0.06    | 0.001 <sup>***</sup>  | 0.08±0.03    | 0.12±0.06    | 0.051 |
| <b>C5:1</b>                        | 0.41±0.17    | 0.02±0.01    | 0.007 <sup>***</sup> | 0.01±0.01     | 0.02±0.01    | 0.197                 | 0.02±0.01     | 0.02±0.01    | 0.356                 | 0.01±0.00     | 0.02±0.01    | 0.195                 | 0.01±0.01    | 0.02±0.01    | 0.206 |
| <b>C6</b>                          | 0.08±0.03    | 0.10±0.12    | 0.607                | 0.06±0.02     | 0.12±0.13    | 0.139                 | 0.06±0.02     | 0.06±0.02    | 0.708                 | 0.05±0.01     | 0.25±0.13    | 0.229                 | 0.07±0.03    | 0.05±0.02    | 0.176 |
| <b>C8</b>                          | 0.09±0.04    | 0.12±0.13    | 0.517                | 0.07±0.04     | 0.16±0.13    | 0.08                  | 0.07±0.03     | 0.09±0.03    | 0.349                 | 0.06±0.02     | 0.11±0.04    | 0.001 <sup>***</sup>  | 0.09±0.04    | 0.09±0.03    | 0.97  |
| <b>C10</b>                         | 0.10±0.06    | 0.14±0.14    | 0.527                | 0.09±0.05     | 0.19±0.10    | 0.006 <sup>**</sup>   | 0.10±0.05     | 0.13±0.05    | 0.132                 | 0.07±0.02     | 0.12±0.05    | 0.005 <sup>**</sup>   | 0.12±0.06    | 0.12±0.05    | 0.874 |
| <b>C10:1</b>                       | 0.07±0.03    | 0.08±0.03    | 0.77                 | 0.08±0.04     | 0.10±0.04    | 0.13                  | 0.09±0.06     | 0.09±0.04    | 0.9                   | 0.05±0.02     | 0.10±0.04    | 0.000 <sup>****</sup> | 0.10±0.06    | 0.10±0.03    | 0.957 |
| <b>C12</b>                         | 0.06±0.03    | 0.12±0.13    | 0.157                | 0.05±0.01     | 0.11±0.04    | 0.000 <sup>****</sup> | 0.05±0.02     | 0.07±0.02    | 0.047 <sup>†</sup>    | 0.05±0.02     | 0.08±0.03    | 0.019 <sup>†</sup>    | 0.08±0.02    | 0.07±0.03    | 0.807 |
| <b>C14</b>                         | 0.08±0.04    | 0.12±0.06    | 0.171                | 0.07±0.02     | 0.11±0.06    | 0.066                 | 0.06±0.03     | 0.08±0.02    | 0.033 <sup>†</sup>    | 0.05±0.02     | 0.09±0.04    | 0.016 <sup>†</sup>    | 0.08±0.03    | 0.06±0.02    | 0.116 |
| <b>C14:1</b>                       | 0.07±0.02    | 0.08±0.04    | 0.399                | 0.08±0.04     | 0.14±0.06    | 0.013 <sup>†</sup>    | 0.09±0.04     | 0.09±0.02    | 0.97                  | 0.08±0.03     | 0.11±0.05    | 0.262                 | 0.13±0.09    | 0.09±0.04    | 0.261 |
| <b>C14:2</b>                       | 0.03±0.02    | 0.04±0.01    | 0.776                | 0.04±0.01     | 0.06±0.02    | 0.000 <sup>****</sup> | 0.04±0.03     | 0.04±0.01    | 0.569                 | 0.03±0.02     | 0.05±0.02    | 0.142                 | 0.06±0.03    | 0.05±0.02    | 0.459 |
| <b>C16</b>                         | 0.73±0.30    | 1.19±0.38    | 0.003 <sup>***</sup> | 0.56±0.20     | 1.36±0.84    | 0.008 <sup>**</sup>   | 0.51±0.18     | 1.23±0.64    | 0.002 <sup>***</sup>  | 0.47±0.24     | 1.16±0.58    | 0.001 <sup>***</sup>  | 0.61±0.21    | 0.83±0.33    | 0.103 |
| <b>C16:1</b>                       | 0.07±0.03    | 0.11±0.04    | 0.013 <sup>†</sup>   | 0.07±0.01     | 0.11±0.06    | 0.030 <sup>†</sup>    | 0.06±0.02     | 0.09±0.05    | 0.108                 | 0.06±0.03     | 0.09±0.06    | 0.117                 | 0.08±0.02    | 0.07±0.03    | 0.292 |
| <b>C18</b>                         | 0.48±0.19    | 0.68±0.20    | 0.033 <sup>†</sup>   | 0.55±0.22     | 1.00±0.71    | 0.08                  | 0.50±0.17     | 1.01±0.55    | 0.009 <sup>**</sup>   | 0.46±0.19     | 0.92±0.40    | 0.002 <sup>***</sup>  | 0.60±0.22    | 0.77±0.26    | 0.142 |
| <b>Phenylalanine</b>               | 48.54±10.52  | 45.50±7.99   | 0.436                | 39.08±7.44    | 41.30±5.79   | 0.457                 | 35.51±6.08    | 43.81±7.73   | 0.020 <sup>†</sup>    | 35.50±6.90    | 36.29±4.71   | 0.748                 | 39.33±6.85   | 40.10±5.99   | 0.807 |
| <b>Tyrosine</b>                    | 50.94±15.63  | 45.39±11.43  | 0.328                | 35.81±8.67    | 38.16±11.81  | 0.64                  | 33.56±6.21    | 34.48±4.65   | 0.723                 | 36.15±5.74    | 32.77±8.81   | 0.021 <sup>†</sup>    | 32.87±3.24   | 37.19±8.62   | 0.161 |
| <b>Glycine</b>                     | 265.93±83.46 | 285.17±51.86 | 0.494                | 352.94±104.61 | 327.91±47.87 | 0.461                 | 382.13±178.43 | 301.78±79.04 | 0.182                 | 346.06±101.54 | 332.68±57.38 | 0.014 <sup>†</sup>    | 303.91±79.82 | 345.11±88.97 | 0.314 |
| <b>Proline</b>                     | 174.99±50.78 | 199.6±66.47  | 0.361                | 148.04±67.00  | 149.97±38.21 | 0.934                 | 116.74±33.31  | 123.94±14.07 | 0.517                 | 116.34±26.14  | 119.48±29.42 | 0.54                  | 131.64±49.06 | 165.02±47.75 | 0.156 |
| <b>Leucine</b>                     | 182.87±79.60 | 177.07±44.63 | 0.822                | 135.50±50.25  | 172.45±52.14 | 0.122                 | 115.84±35.13  | 148.87±30.62 | 0.037 <sup>†</sup>    | 116.93±29.40  | 139.13±41.82 | 0.254                 | 119.73±23.34 | 151.08±43.36 | 0.059 |
| <b>Methionine</b>                  | 16.73±6.36   | 18.34±5.78   | 0.537                | 12.76±5.15    | 14.96±7.49   | 0.482                 | 11.77±2.79    | 14.62±6.96   | 0.327                 | 12.37±3.02    | 10.22±2.83   | 0.049 <sup>†</sup>    | 11.49±3.65   | 11.81±3.61   | 0.857 |

R: responders; NR: non-responders; <sup>†</sup>P<0.05, <sup>\*\*</sup>P<0.01, <sup>\*\*\*</sup>P<0.005, <sup>\*\*\*\*</sup>P<0.001.
